# Supplementary material for: Formation of nickel-thiolate aggregates via reaction with CH2Cl2
Source: Royal Society of Chemistry journal article supplement (doi:10.1039/b309523a), 2003-01-01
Supplement: b309523a.doc [file b309523a.doc]

Supporting Information for:

**Formation of Nickel-thiolate Aggregates via Reaction with CH2Cl2**

Qiang Wang,Andrew C. Marr, Alexander J. Blake,Claire Wilson and Martin Schröder*

*School of Chemistry, The University of Nottingham, Nottingham, NG7 2RD, UK*

**Materials and Methods:**

All manipulations, reactions and transfers of samples were conducted under pure argon or N2 atmospheres using standard Schlenk techniques. All solvents were pre-dried and refluxed under N2 over suitable drying agents. Unless otherwise noted in the text, the reagents were used as purchased from the suppliers and were used as received.

Elemental analyses were carried out by the Microanalytical Service at the University of Nottingham (Exeter Analytical Inc CE-440 Elemental analyser). Infrared spectra were recorded on a Nicolet Avatar 360 FTIR spectrometer. NMR spectra were recorded on a Bruker DPX 300 spectrometer running at 300.13 MHz for 1H, 121.5 MHz for 31P and 75.42 MHz for 13C experiments. Mass spectra were recorded by the Mass Spectrometry Service at the University of Nottingham and by the EPSRC National Mass Spectrometry Service at the University of Wales, Swansea.

**Syntheses**:

4,5-dimethyl-1,2-benzenedimethylethanethiol (H2L1) was used as purchased from Aldrich. 2,4,6-tri-isopropylthiophenol (HL3)1 and 2-mercaptomethyl-benzenethiol (H2L4)2 were prepared *via* a modification of literature methods. The precursor complexes [NiCl2(dppe)] and [NiBr2(dppe)] were prepared *via* literature methods.3 The procedures for the synthesis of [Ni-dithiolate(dppe)] and [Ni-dithiolate(dcpe)] complexes were based on that devised by Bowmarker *et al*.4

**Synthesis of [Ni(L1)(dppe)]**

To a slurry of [NiBr2(dppe)] (0.25 g, 0.40 mmol) in a solution of H2L1 (0.08 g, 0.40 mmol) in EtOH (10 cm3) was added EtONa/EtOH (3.5 cm3, 0.25mol/L; 0.87 mmol). The solution was stirred for 40 mins and then degassed water (20 cm3) was added to afford further precipitation of the product. The mixture was stirred for a further 1 h and then filtered. The brown solid was washed with EtOH and *n*-hexane and then dried *in vacuo*. The solid was extracted into CH2Cl2 and removal of CH2Cl2 *in vacuo*yielded a brown solid. Yield, 0.21g, 80%. Found: C, 63.79; H, 5.32%. Calc. For C36H36P2S2Ni·0.33CH2Cl2: C, 63.95; H, 5.38%. FAB MS: *m/z* 653 (M)+ . 1H NMR (300.13 MHz, CDCl3, 298K), : 2.07 (4H, d, 2*J*H-P = 16.9 Hz, PCH2,), 2.25 (6H, s, CH3), 3.67 (4H, s, SCH2), 6.68 (2H, s, Ph-H ), 7.35-7.72 (20H, m, P-Ph-H); 31P{1H} NMR (121.5MHz, CDCl3, 298K), : 55.30(s); 13C{1H} NMR (75.47MHz, CDCl3, 298K) c: 128.42-139.45 (m, Ph-C’s), 30.69 (s, SCH2), 28.38 (s, PCH2), 19.38 (s, CH3). IR (KBr disc): 3048m, 3001w, 2914m, 1615w, 1584w, 1571w, 1503m, 1483m, 1451w, 1434vs, 1410m, 1383w, 1308w, 1217m, 1188m, 1100vs, 1070w, 1026m, 998m, 876m, 814s, 754s, 691vs, 678s, 649w, 530vs, 484s, 450w cm-1.

### **Synthesis of [Ni(L1)(dcpe)]**

To a slurry of [NiCl2(dcpe)] (0.13 g, 0.23 mmol) in a solution of H2L1 (0.057 g, 0.28 mmol) in MeOH (15cm3) was added NaOMe/MeOH (1.2 cm3, 0.50 M; 0.60 mmol). The mixture was stirred for 3.5 h and the orange-red precipitate was collected and washed with MeOH. The complex was extracted into CH2Cl2 and removal of CH2Cl2 from the fltrate yielded an orange solid. Yield, 0.093g, 60%. Found: C, 62.10; H, 8.46%. Calc. For C36H60NiP2S2·0.25CH2Cl2: C, 62.39; H, 8.68%. FAB MS: *m/z* 677 (M + H)+. 1H NMR (300.13 MHz, CDCl3, 298K), : 1.1-1.9 (50H, m, cyclohexyl-H and CH3), 2.17 (4H, m, PCH2), 3.77 (4H, s, SCH2), 6.93(2H, s, Ph-H); 31P{1H} NMR (121.5MHz, CDCl3, 298K), : 73.57(s); 13C{1H} NMR (75.47MHz, CDCl3, 298K) c: 139.44, 133.00, 129.81 (Ph-C’s), 35.94-35.61 (m, SCH2), 29.77 (m, PCH2), 27.46-19.30 (m, cyclohexyl-C’s and CH3). IR (KBr disc): 2923vs, 2848vs, 1636m, 1616s, 1504m, 1446s, 1409m, 1384w, 1344w, 1293w, 1268m, 1196w, 1178w, 1118w, 1076w, 1004m, 915w, 887m, 850m, 796m, 740m, 661w, 644w, 534m, 511w, 463w cm-1.

**Synthesis of [Ni(L3)2(dppe)]**

To a slurry of [NiBr2(dppe)](0.16 g, 0.26 mmol) in a solution of HL3 (0.12 g, 0.52mmol) in EtOH (15cm3) was added an EtONa/EtOH solution (2.1 cm3, 0.25 mol/L; 0.52 mmol). The mixture was stirred for 3 h and then degassed water (15 cm3) was added slowly to afford further precipitation of the complex. The mixture was filtered, and the dark green precipitate was washed with H2O, and then EtOH. The product was dried in *vacuo* and then extracted into CH2Cl2. Removal of solvent from the filtrate *in vacuo* afforded a dark green solid product. Yield, 0.17g, 70%. Found: C, 72.21; H, 7.50%. Calc. For C56H70NiP2S2: C, 72.50; H, 7.60%. FAB MS: *m/z* 927 (M+). 1H NMR (300.13 MHz, CDCl3, 298K), : 1.03-1.12 (36H, m, CH3), 2.11 (4H, d, 2*J*H-P = 19.5 Hz, PCH2), 2.61(2H, *heptet*, 3*J*H-H = 6.9 Hz, *o*-CH(Me)2), 4.05 (4H, *heptet*, 3*J*H-H = 6.9 Hz, *m*-CH(Me)2), 6.52(4H, s, S-Ph-H ), 7.28-7.84 (20H, m, P-Ph-H ); 31P{1H} NMR (121.5MHz, CDCl3, 298K), : 53.90(s); 13C{1H} NMR (75.47MHz, CDCl3, 298K) c: 152.39, 144.43, 133.86, 130.64, 128.98, 128.85, 128.49, 120.10, 34.48, 32.51, 26.79, 24.17 (d, *J*C-P = 19.2 Hz). IR (KBr disc): 3052m, 2956vs, 2865s, 1595w, 1573w, 1484m, 1463m, 1435s, 1422m, 1377m, 1355m, 1309m, 1188w, 1162w, 1099s, 1058m, 1027w, 999w, 872m, 815m, 746s, 691s, 677m, 648m, 530s, 482m, 447w, 433w, 419m, 405m cm-1.

### **Synthesis of [Ni(L3)2(dcpe)]**

To a slurry of [NiBr2(dcpe)] (0.21 g, 0.32 mmol) in a solution of HL3 (0.17g, 0.71 mmol) in MeOH (20 cm3) was added a NaOMe/MeOH solution (1.5cm3, 0.5M; 0.75 mmol). The mixture was stirred for 6.5 h and the purple-red precipitate was collected by suction, washed with MeOH and dried in *vacuo*. The solid was extracted into CH2Cl2 and removal of CH2Cl2 from the filtrate in vacuo yielded a purple-red solid. Yield, 0.20g, 65%. Found: C, 69.74; H, 10.03%. Calc. For C56H94NiP2S2: C, 70.64; H, 9.95%. FAB MS: *m/z* 952 (M+), 715 (M+-C15H23S). 1H NMR (300.13 MHz, CDCl3, 298K), : 1.19-1.87 (80H, m, cyclohexyl-H and -CH3), 2.55 (4H, m, PCH2 ), 2.75 (2H, *heptet*, 3*J*H-H = 6.7 Hz, *p*-CH(Me)2), 4.16 (4H, *heptet*, 3*J*H-H = 6.8 Hz, *m*-CH(Me)2 ), 6.79 (4H, s, Ph-H). 31P{1H} NMR (121.5MHz, CDCl3, 298K), : 69.20 (s). 13C{1H} NMR (75.47MHz, CDCl3, 298K) c: 151.64, 142.93, 118.97 (Ph-CH’s), 33.50, 33.36, 33.22, 31.24, 29.02, 28.30, 26.23, 25.23, 23.05, 19.55 (alkyl-C’s). IR (KBr disc): 2925vs, 2852vs, 1713m, 1637s, 1617s, 1558w, 1462m, 1447m, 1421m, 1377m, 1355m, 1297w, 1260w, 1242w, 1217w, 1179w, 1164w, 1106w, 1058m, 1005w, 937w, 889w, 871m, 850m, 795m, 740m, 662w, 531m, 465w cm-1.

### **Synthesis of [Ni(L4)(dppe)]**

To a slurry of [NiBr2(dppe)] (0.28 g, 0.45 mmol) in a solution of H2L4 (0.07 g, 0.45 mmol) in EtOH (15cm3) was added a NaOEt/EtOH solution (3.6 cm3, 0.25 mol/L; 0.9 mmol). The mixture was stirred for 3 h at room temperature, and degassed H2O (15 cm3) was added to afford further precipitation of the complex. The solution was filtered and the orange solid obtained was washed with H2O, EtOH, and Et2O. The solid was then dried in vacuo and extracted into CH2Cl2. Removal of CH2Cl2 in *vacuo* yielded [Ni(L4)(dppe)] as an orange solid. Yield, 0.21g, 75%. Found: C, 61.83; H, 4.65%. Calc. For C53H30NiP2S2.0.5CH2Cl2: C, 61.51; H, 4.74%. FAB MS: *m/z* 611 (M+). 1H NMR (300.13 MHz, CDCl3, 298K), : 2.24 (4H, m, PCH2), 3.46 (2H, m, SCH2), 6.85-7.88 (24H, m, Ph-H); 31P{1H} NMR (121.5MHz, CDCl3, 298K), : 54.62 (d, 3*J*P-P = 41.67 Hz), 61.31(d, 3*J*P-P= 41.41 Hz); 13C{1H} NMR (75.47MHz, CDCl3, 298K) c: 146.20 and 124.69-134.21 (m, Ph-CH’s ), 34.20 (SCH2), 27.11-28.94 (m, PCH2). IR (KBr disc): 3048m, 2890w, 1571w, 1483m, 1459m, 1434vs, 1409m, 1308w, 1270w, 1187m, 1159w, 1101s, 1061m, 1026m, 998m, 875m, 816m, 745s, 711s, 690vs, 679s, 652m, 617w, 531vs, 484s, 440w cm-1.

### **Synthesis of [Ni(L4)(dcpe)]**

To a slurry of [NiBr2(dcpe)] (0.20 g, 0.30 mmol) in a solution of H2L4 (0.05g, 0.34 mmol) in MeOH (15cm3), was added a MeONa/MeOH solution (1.4 cm3, 0.5 mol/L; 0.7 mmol). The mixture was stirred for 6 h at room temperature and the orange precipitate was collected and washed with MeOH and dried *in vacuo*. The complex was extracted into CH2Cl2, and removal of CH2Cl2 in *vacuo* yielded [Ni(L4)(dcpe)] as an orange solid. Yield, 0.14 g, 72%. Found: C, 56.36; H, 7.81%. Calc. For C33H54NiP2S2·CH2Cl2: C, 56.68; H, 7.83%. FAB MS: *m/z* 635 (M+). 1H NMR (300.13 MHz, CDCl3, 298K), : 1.18-1.82 (44H, m, cyclohexyl-H), 2.21-2.41 (4H, m, PCH2), 3.39 (2H, m, SCH2), 7.00-7.49 (4H, m, Ph-H); 31P{1H} NMR (121.5MHz, CDCl3, 298K), : 75.08(d, 3*J*P-P = 34.08 Hz), 79.42(d, 3*J*P-P = 34.63 Hz); 13C{1H} NMR (75.47MHz, CDCl3, 298K) c: 146.12, 131.98, 126.23, 125.52, 123.95 (Ph-CH’s), 36.02-35.21 (m, SCH2), 29.53 (m, PCH2), 27.45-26.13 (m, cyclohexyl-C). IR (KBr disc): 2925vs, 2849vs, 1458m, 1446s, 1409m, 1385w, 1344w, 1293w, 1268m, 1195m, 1179w, 1171w, 1109m, 1078w, 1062w, 1027w, 1004m, 915w, 889w, 850m, 820w, 791w, 737s, 695w, 666m, 646w, 533m, 464w cm-1.

**References:**

1. Blower, P. J.; Dilworth, J. R.; Hutchinson, J. P.; Zubieta, J. A. *J. Chem. Soc, Dalton Trans.* 1985, 1533.
2. Hortmann, A. G.; Aron, A. J.; Bhattacharya, A. K. *J. Org. Chem.* 1978, **43**, 3374.
3. Booth, G.; Chatt, J. *J. Chem. Soc.* 1965, 3238; Hecke, G. R. V.; Horrocks, W. D. *Inorg. Chem.* 1966, **5**, 1968.

4. Bowmaker, G. A.; Boyd, P. D. W.; Campbell, G. K. *Inorg. Chem.* 1982, **21**, 2403.
